# Supplementary material for: Luminescent/Temperature-Sensing Properties of Multifunctional Rare-Earth Upconversion Kevlar Nanofiber Composite under 1550 nm
Source: MDPI journal article supplement (doi:10.3390/nano14090740), 2024-04-24
Supplement: s1 [file s1]

## Suppotring Information

# **Luminescence/Temperature-sensing properties of multifunctional rare-earth upconversion Kevlar nanofiber composite under 1550 nm**

Juan Li<sup>1</sup>, Shengang Xu<sup>1,3</sup>, Yingliang Liu<sup>1,3\*</sup>, Shaokui Cao<sup>1,2\*</sup>

<sup>a</sup>School of Materials Science and Engineering, Zhengzhou University, Zhengzhou 450001, People's Republic of China.

<sup>b</sup>Huanghe Science and Technology College, Zhengzhou, Henan 450063, People's Republic of China.

<sup>c</sup>Henan Key Laboratory of Advanced Nylon Materials and Application, Zhengzhou University, Zhengzhou 450001, People's Republic of China.

Correspondence: liuylxn@zzu.edu.cn (Y.L.); caoshaokui@zzu.edu.cn (S.C.)

**Table S1** Chemical composition of Ln<sup>3+</sup> in UCNPs

| Y <sup>3+</sup> content (mol%) | Er <sup>3+</sup> content ( mol%) | Tm <sup>3+</sup> content ( mol%) |
|--------------------------------|----------------------------------|----------------------------------|
| 95                             | 5                                | 0                                |
| 92.5                           | 7.5                              | 0                                |
| 90                             | 10                               | 0                                |
| 87.5                           | 12.5                             | 0                                |
| 85                             | 15                               | 0                                |
| 80                             | 20                               | 0                                |
| 60                             | 40                               | 0                                |
| 40                             | 60                               | 0                                |
| 20                             | 80                               | 0                                |
| 0                              | 100                              | 0                                |
| 1%                             | 99.5                             | 0.5                              |
| 0                              | 99                               | 1                                |

**Table S2** UCNPs/KNFs composites with different mass ratio between UCNPs and KNFs

| Sample number | V <sub>M-KNFs</sub> (mL)<br>(3 mg/mL) | V <sub>1</sub> (mL)<br>(6 mg/mL) | V <sub>2</sub> (mL)<br>(6 mg/mL) | V <sub>3</sub> (mL)<br>(6 mg/mL) | Deionized water (mL) |
|---------------|---------------------------------------|----------------------------------|----------------------------------|----------------------------------|----------------------|
| 1             | 10                                    | 0                                | 0                                | 0                                | 5                    |
| 2-1           | 10                                    | 0.55                             | 0                                | 0                                | 4.45                 |
| 2-2           | 10                                    | 1.25                             | 0                                | 0                                | 3.75                 |
| 2-3           | 10                                    | 2.14                             | 0                                | 0                                | 2.86                 |
| 2-4           | 0                                     | 2.14                             | 0                                | 0                                | 12.86                |
| 3-1           | 10                                    | 0                                | 0.55                             | 0                                | 4.45                 |
| 3-2           | 10                                    | 0                                | 1.25                             | 0                                | 3.75                 |
| 3-3           | 10                                    | 0                                | 2.14                             | 0                                | 2.86                 |
| 3-4           | 0                                     | 0                                | 2.14                             | 0                                | 12.86                |
| 4-1           | 10                                    | 0                                | 0                                | 0.55                             | 4.45                 |
| 4-2           | 10                                    | 0                                | 0                                | 1.25                             | 3.75                 |
| 4-3           | 10                                    | 0                                | 0                                | 2.14                             | 2.86                 |
| 4-4           | 0                                     | 0                                | 0                                | 2.14                             | 12.86                |

Note: V<sub>1</sub>, V<sub>2</sub> and V<sub>3</sub> were volume of PEG-modified NaYF<sub>4</sub>: Er(12.5 mol%) @NaYF<sub>4</sub>, NaErF<sub>4</sub> @NaYF<sub>4</sub> and NaErF<sub>4</sub>: Tm(0.5 mol%) @NaYF<sub>4</sub> aqueous solutions, respectively.

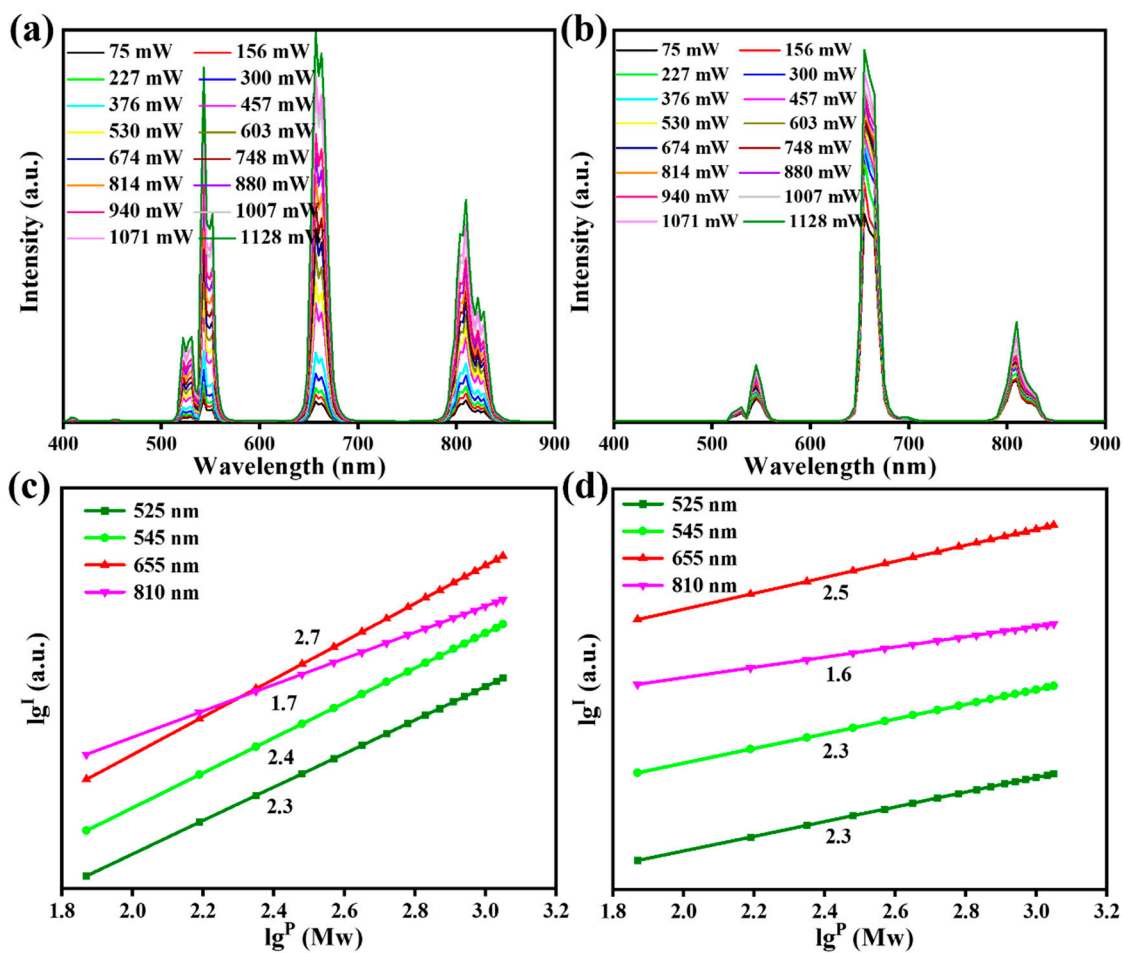

**Figure. S1** Upconversion emission spectra of  $\text{NaErF}_4 @ \text{NaYF}_4$  (a) and  $\text{NaErF}_4: \text{Tm}(0.5 \text{ mol}\%) @ \text{NaYF}_4$  (b) under different excitation power at 1550 nm; emission intensity as a logarithmic function of excitation power for  $\text{NaErF}_4 @ \text{NaYF}_4$  (c) and  $\text{NaErF}_4: \text{Tm}(0.5 \text{ mol}\%) @ \text{NaYF}_4$  (d). The numbers next to the lines refers to the slope of each line.

**Table S3** Mechanical tensile parameters of pure KNFs, pure M-KNFs, and UCNPs/KNFs composite films.

| Sample           | Tensile strength (MPa) | Strain at fracture (%) | Young's modulus (GPa) |
|------------------|------------------------|------------------------|-----------------------|
| Pure KNFs        | 192.37                 | 3.01                   | 6.39                  |
| Pure M-KNFs      | 161.23                 | 2.78                   | 5.80                  |
| UCNPs (10%)/KNFs | 122.70                 | 2.20                   | 5.58                  |
| UCNPs (20%)/KNFs | 96.60                  | 2.04                   | 4.73                  |
| UCNPs (30%)/KNFs | 62.82                  | 1.36                   | 4.62                  |

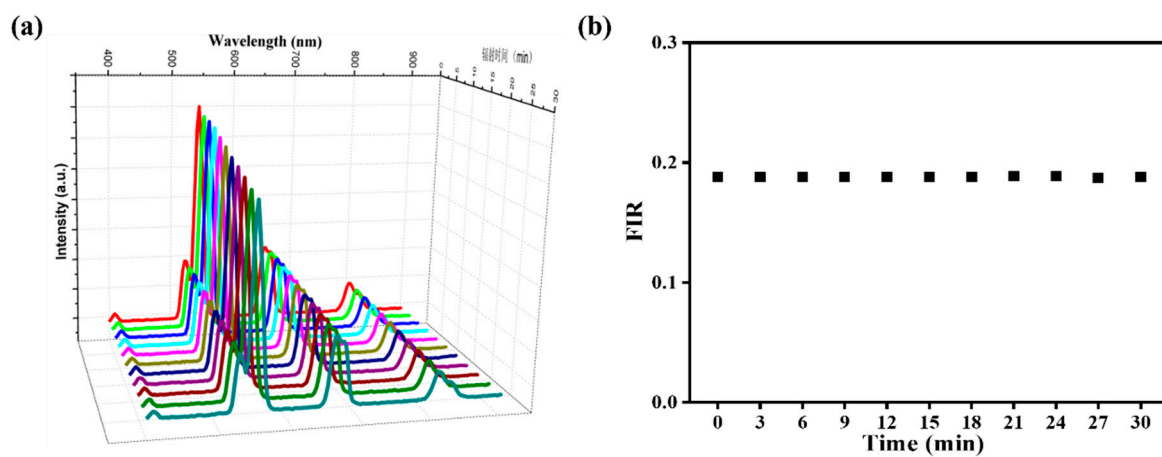

**Figure. S2** The upconversion spectra of UCNPs/Kevlar films upon 1550 nm ( $2.5 \text{ W/cm}^2$ ) at different time (a); The dependence of FIR on irradiation time (b)
